# Supplementary material
Source: publisher figshare collection journal article supplement (https://sage.figshare.com/ndownloader/files/12818774)
Supplement: Supplementary file 1 [file 12818774]

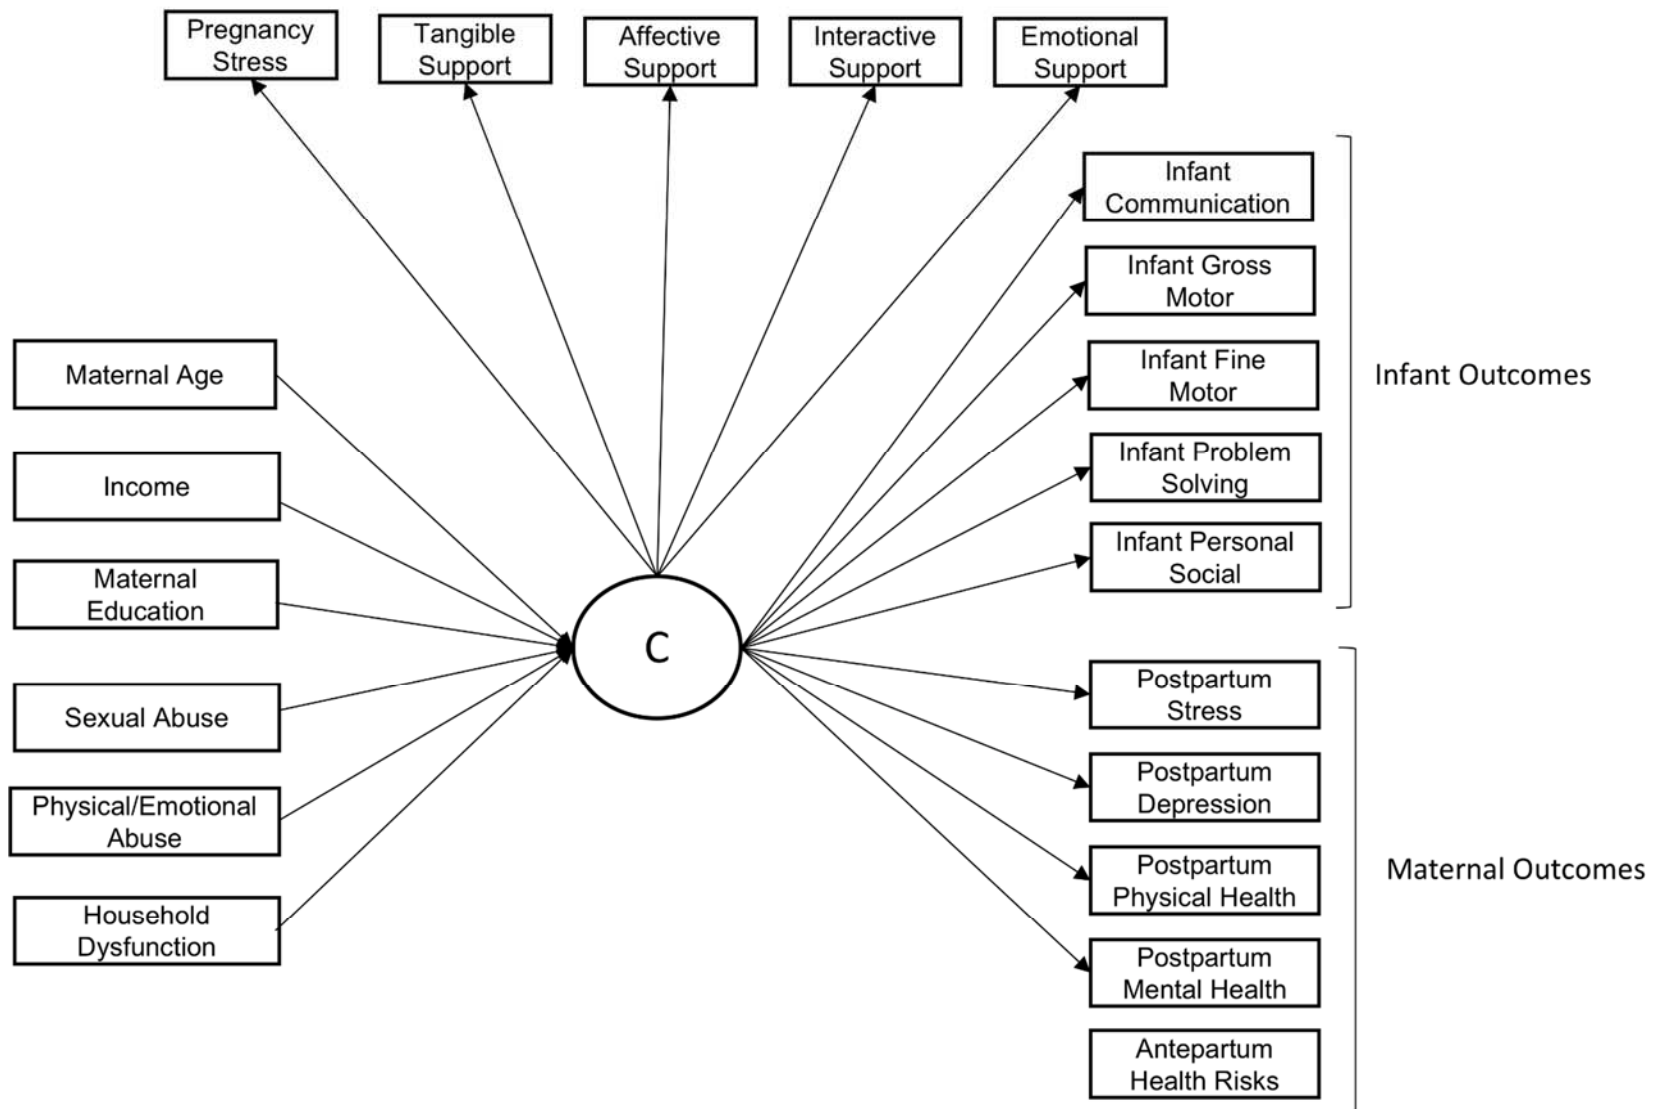

**Supplementary Figure 1.** Conceptual model tested for the latent profile analysis. C= latent class grouping.
